# Supplementary material for: Highly efficient simultaneous ultrasonic-assisted adsorption of methylene blue and rhodamine B onto metal organic framework MIL-68(Al): central composite design optimization
Source: Royal Society of Chemistry journal article supplement (doi:10.1039/c5ra28052d), 2016-01-01
Supplement: c5ra28052d1.pdf [file c5ra28052d1.pdf]

## Supporting Information

# Highly efficient simultaneous ultrasonic-assisted adsorption of Methylene Blue and Rhodamine B onto Metal Organic Framework MIL-68(Al): Central composite design optimization

Mahnaz Saghanejhad Tehrani, Rouhollah Zare-Dorabei \*

Research Laboratory of Spectrometry & Micro and Nano Extraction, Department of Chemistry, Iran University of Science and Technology, Narmak, Tehran, 16846-13114, Iran.

\* Corresponding author. E-mail address: Zaredorabei@iust.ac.ir

## Results and discussion; Characterization of MIL-68(Al)

According to the Fig.S1, a peak at  $3438\text{ cm}^{-1}$  can be assigned to the absorption of  $\text{H}_2\text{O}$  on the sample. The most intense signals at  $1598\text{ cm}^{-1}$  and  $1390\text{ cm}^{-1}$  clearly ascribe the presence of the vibrational bands characteristic of the carboxylates groups ( $\nu\text{C}=\text{O}$ ) within MIL-68(Al). The signal at  $863\text{ cm}^{-1}$  is due to the bending mode related to the  $\text{U}_2$ -hydroxo groups of the corner-sharing octahedral  $\text{AlO}_4(\text{OH})_2$ .

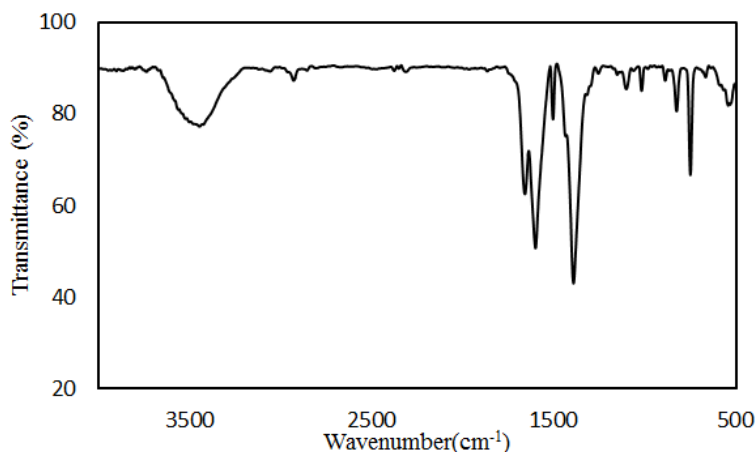

Fig.S1. FT- IR spectra of MIL-68(Al) sample

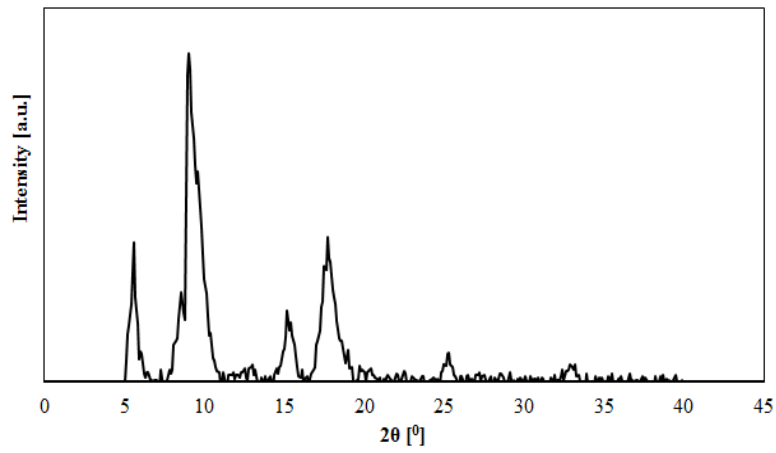

Fig.S2. XRD diffraction pattern of synthesized MIL-68(Al)

According to the N<sub>2</sub> adsorption-desorption analysis, desorption average pore width obtained by BET and BJH desorption average pore diameter was evaluated about 2.90 and 5.36 nm respectively.

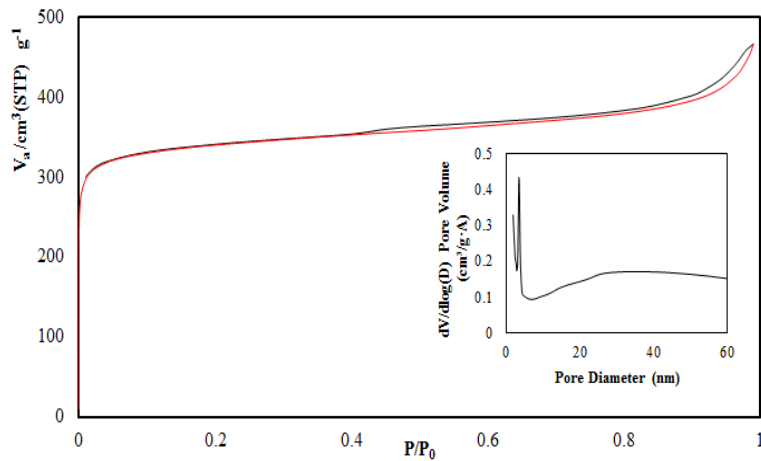

Fig.S3. N<sub>2</sub> adsorption/desorption isotherm at 77 K and BJH pore size distributions (inset) for synthesized MIL-68(Al)

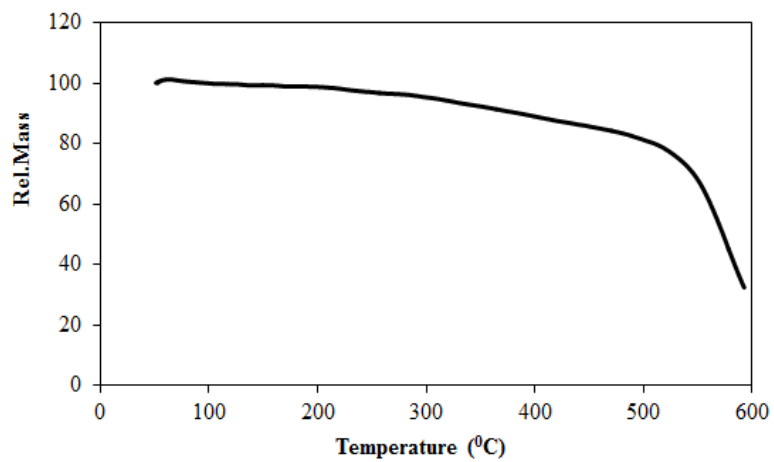

Fig. S4. TGA curve of the as-prepared MIL-68(Al) under air (heating rate of 5 K per minute, 10 mg of solid).

**Central composite design (CCD); Experimental design for single and binary dye solutions**

Table S1- Experimental factors and levels with responses for binary dye solutions according to the central composite design.

| Factors               | Levels      |                |              | Star point |            |
|-----------------------|-------------|----------------|--------------|------------|------------|
|                       | Low<br>(-1) | Central<br>(0) | High<br>(+1) | - $\alpha$ | + $\alpha$ |
| (A) Time              | 8           | 10             | 12           | 6          | 14         |
| (B) pH                | 4           | 6              | 8            | 2          | 10         |
| (C) Adsorbent dosage  | 6           | 10             | 14           | 2          | 18         |
| (D) MB Concentration  | 60          | 80             | 100          | 40         | 120        |
| (E) RhB Concentration | 15          | 20             | 25           | 10         | 30         |

  

| Runs | A  | B  | C  | D   | E  | (R <sub>3</sub> ) | (R <sub>4</sub> ) |
|------|----|----|----|-----|----|-------------------|-------------------|
| 1    | 10 | 6  | 2  | 80  | 20 | 45.5              | 23.4              |
| 2    | 8  | 4  | 6  | 100 | 15 | 46.1              | 15.0              |
| 3    | 10 | 6  | 10 | 120 | 20 | 69.5              | 16.2              |
| 4    | 8  | 4  | 14 | 100 | 25 | 86.9              | 32.1              |
| 5    | 8  | 8  | 6  | 60  | 15 | 88.6              | 36.8              |
| 6    | 10 | 6  | 10 | 80  | 20 | 92.4              | 33.8              |
| 7    | 10 | 6  | 10 | 80  | 10 | 92.4              | 42.9              |
| 8    | 10 | 6  | 10 | 80  | 20 | 93.5              | 32.3              |
| 9    | 12 | 8  | 14 | 100 | 25 | 97.3              | 35.9              |
| 10   | 10 | 6  | 10 | 80  | 20 | 91.3              | 33.1              |
| 11   | 10 | 6  | 18 | 80  | 20 | 99.7              | 80.5              |
| 12   | 10 | 6  | 10 | 80  | 20 | 92.5              | 34.1              |
| 13   | 8  | 8  | 14 | 60  | 25 | 97.7              | 50.7              |
| 14   | 8  | 4  | 6  | 60  | 25 | 63.7              | 26.6              |
| 15   | 10 | 6  | 10 | 80  | 20 | 92.8              | 32.0              |
| 16   | 12 | 8  | 14 | 60  | 15 | 100               | 66.7              |
| 17   | 6  | 6  | 10 | 80  | 20 | 91.9              | 27.2              |
| 18   | 10 | 2  | 10 | 80  | 20 | 61.0              | 20.6              |
| 19   | 10 | 6  | 10 | 40  | 20 | 97.7              | 55.8              |
| 20   | 12 | 8  | 6  | 60  | 25 | 89.1              | 21.4              |
| 21   | 10 | 6  | 10 | 80  | 30 | 90.3              | 25.0              |
| 22   | 12 | 8  | 6  | 100 | 15 | 67.8              | 10.0              |
| 23   | 12 | 4  | 14 | 100 | 15 | 85.7              | 35.8              |
| 24   | 12 | 4  | 14 | 60  | 25 | 96.8              | 58.9              |
| 25   | 14 | 6  | 10 | 80  | 20 | 96.1              | 37.6              |
| 26   | 10 | 6  | 10 | 80  | 20 | 91.3              | 37.0              |
| 27   | 12 | 4  | 6  | 100 | 25 | 45.6              | 11.0              |
| 28   | 8  | 8  | 6  | 100 | 25 | 76.7              | 10.7              |
| 29   | 12 | 4  | 6  | 60  | 15 | 70.6              | 28.0              |
| 30   | 8  | 8  | 14 | 100 | 15 | 97.3              | 45.2              |
| 31   | 10 | 10 | 10 | 80  | 20 | 93.0              | 22.5              |
| 32   | 8  | 4  | 14 | 60  | 15 | 97.6              | 66.4              |

R<sub>3</sub>: MB removal% in binary solution, R<sub>4</sub>: RhB removal% in binary solution

Table S2. Experimental factors and levels with responses for single dye solution (MB) according to the central composite design

| Factors                     | Levels      |                |              | Star point |            |
|-----------------------------|-------------|----------------|--------------|------------|------------|
|                             | Low<br>(-1) | Central<br>(0) | High<br>(+1) | - $\alpha$ | + $\alpha$ |
| (A) Time (min)              | 8           | 10             | 12           | 6          | 14         |
| (B) pH                      | 4           | 6              | 8            | 2          | 10         |
| (C) Adsorbent dosage (mg)   | 6           | 10             | 14           | 2          | 18         |
| (D) MB Concentration (mg/L) | 60          | 80             | 100          | 40         | 120        |

| Runs  | A     | B     | C     | D      | (R <sub>1</sub> ) |
|-------|-------|-------|-------|--------|-------------------|
| 1     | 12.00 | 4.00  | 6.00  | 60.00  | 63.51             |
| 2     | 8.00  | 8.00  | 6.00  | 60.00  | 90.81             |
| 3     | 12.00 | 8.00  | 14.00 | 60.00  | 100               |
| 4     | 8.00  | 4.00  | 6.00  | 100.00 | 47.04             |
| 5     | 8.00  | 8.00  | 14.00 | 100.00 | 97.25             |
| 6(C)  | 10.00 | 6.00  | 10.00 | 80.00  | 94.24             |
| 7     | 12.00 | 4.00  | 14.00 | 100.00 | 89.12             |
| 8     | 12.00 | 8.00  | 6.00  | 100.00 | 80.92             |
| 9     | 8.00  | 4.00  | 14.00 | 60.00  | 99.07             |
| 10(C) | 10.00 | 6.00  | 10.00 | 80.00  | 94.28             |
| 11    | 12.00 | 8.00  | 6.00  | 60.00  | 93.47             |
| 12    | 12.00 | 8.00  | 14.00 | 100.00 | 98.22             |
| 13    | 8.00  | 8.00  | 6.00  | 100.00 | 77.03             |
| 14    | 8.00  | 8.00  | 14.00 | 60.00  | 99.76             |
| 15    | 8.00  | 4.00  | 6.00  | 60.00  | 64.29             |
| 16(C) | 10.00 | 6.00  | 10.00 | 80.00  | 93.31             |
| 17    | 12.00 | 4.00  | 6.00  | 100.00 | 49.11             |
| 18(C) | 10.00 | 6.00  | 10.00 | 80.00  | 94.86             |
| 19    | 12.00 | 4.00  | 14.00 | 60.00  | 100               |
| 20    | 8.00  | 4.00  | 14.00 | 100.00 | 87.02             |
| 21    | 10.00 | 2.00  | 10.00 | 80.00  | 61.1              |
| 22(C) | 10.00 | 6.00  | 10.00 | 80.00  | 94.21             |
| 23    | 14.00 | 6.00  | 10.00 | 80.00  | 95.99             |
| 24    | 10.00 | 6.00  | 10.00 | 40.00  | 98.59             |
| 25    | 10.00 | 6.00  | 10.00 | 120.00 | 74.33             |
| 26    | 6.00  | 6.00  | 10.00 | 80.00  | 91.5              |
| 27    | 10.00 | 6.00  | 2.00  | 80.00  | 42.05             |
| 28    | 10.00 | 10.00 | 10.00 | 80.00  | 95                |
| 29    | 10.00 | 6.00  | 18.00 | 80.00  | 100               |
| 30(C) | 10.00 | 6.00  | 10.00 | 80.00  | 93.18             |

R<sub>1</sub>: MB removal % in single solution

C: Center point

Table S3. Experimental factors and levels with responses for single dye solution (RhB) according to the central composite design

| Factors                      | Levels      |                |              | Star point |            |
|------------------------------|-------------|----------------|--------------|------------|------------|
|                              | Low<br>(-1) | Central<br>(0) | High<br>(+1) | - $\alpha$ | + $\alpha$ |
| (A) Time (min)               | 8           | 10             | 12           | 6          | 14         |
| (B) pH                       | 4           | 6              | 8            | 2          | 10         |
| (C) Adsorbent dosage (mg)    | 6           | 10             | 14           | 2          | 18         |
| (D) RhB Concentration (mg/L) | 15          | 20             | 25           | 10         | 30         |

| Runs  | A     | B    | C     | D     | (R <sub>2</sub> ) |
|-------|-------|------|-------|-------|-------------------|
| 1(C)  | 10.00 | 6.00 | 10.00 | 20.00 | 89.24             |
| 2     | 8.00  | 4.00 | 14.00 | 15.00 | 95.00             |
| 3     | 12.00 | 4.00 | 14.00 | 25.00 | 83.15             |
| 4     | 12.00 | 8.00 | 14.00 | 15.00 | 68.02             |
| 5     | 8.00  | 8.00 | 14.00 | 25.00 | 55.85             |
| 6     | 8.00  | 8.00 | 6.00  | 15.00 | 50.66             |
| 7     | 8.00  | 4.00 | 6.00  | 25.00 | 61.70             |
| 8     | 12.00 | 4.00 | 6.00  | 15.00 | 76.74             |
| 9     | 12.00 | 8.00 | 6.00  | 25.00 | 49.10             |
| 10(C) | 10.00 | 6.00 | 10.00 | 20.00 | 88.83             |
| 11    | 12.00 | 4.00 | 14.00 | 15.00 | 97.03             |
| 12    | 8.00  | 8.00 | 6.00  | 25.00 | 44.91             |
| 13    | 12.00 | 8.00 | 14.00 | 25.00 | 49.87             |
| 14    | 8.00  | 8.00 | 14.00 | 15.00 | 61.90             |
| 15    | 8.00  | 4.00 | 14.00 | 25.00 | 79.69             |
| 16    | 8.00  | 4.00 | 6.00  | 15.00 | 63.02             |
| 17    | 12.00 | 4.00 | 6.00  | 25.00 | 71.16             |
| 18    | 12.00 | 8.00 | 6.00  | 15.00 | 61.99             |
| 19(C) | 10.00 | 6.00 | 10.00 | 20.00 | 88.03             |
| 20(C) | 10.00 | 6.00 | 10.00 | 20.00 | 90.02             |
| 21    | 14.00 | 6.00 | 10.00 | 20.00 | 92.86             |
| 22    | 10.00 | 6.00 | 10.00 | 30.00 | 73.27             |
| 23    | 10.00 | 2.00 | 10.00 | 20.00 | 59.52             |
| 24(C) | 10.00 | 6.00 | 10.00 | 20.00 | 91.27             |
| 25    | 6.00  | 6.00 | 10.00 | 20.00 | 77.58             |
| 26(C) | 10.00 | 6.00 | 10.00 | 20.00 | 88.14             |
| 27    | 10.00 | 6.00 | 18.00 | 20.00 | 93.31             |
| 28    | 10.00 | 10.0 | 10.00 | 20.00 | 20.07             |
| 29    | 10.00 | 6.00 | 2.00  | 20.00 | 63.03             |
| 30    | 10.00 | 6.00 | 10.00 | 10.00 | 95.04             |

R<sub>2</sub>: RhB removal % in single solution  
 C: Center point

## The results of ANOVA and P-values

Table S4. ANOVA for response surface quadratic model for MB in single solution

| Source             | Sum of Squares | df | Mean Square | F-value | Prob > F                  |
|--------------------|----------------|----|-------------|---------|---------------------------|
| Block              | 7.67           | 2  | 3.84        |         |                           |
| Model              | 8661.83        | 14 | 618.70      | 218.68  | <0.0001                   |
| A-Time             | 18.48          | 1  | 18.48       | 6.53    | 0.0239                    |
| B-pH               | 1769.88        | 1  | 1769.8      | 625.58  | <0.0001                   |
| C-Dosage           | 4270.93        | 1  | 4270.9      | 1509.5  | <0.0001                   |
| D-MB concentration | 745.04         | 1  | 745.04      | 263.34  | <0.0001                   |
| AB                 | 0.74           | 1  | 0.74        | 0.26    | 0.6177                    |
| AC                 | 0.81           | 1  | 0.81        | 0.29    | 0.6016                    |
| AD                 | 2.24           | 1  | 2.24        | 0.79    | 0.3903                    |
| BC                 | 603.44         | 1  | 603.44      | 213.29  | <0.0001                   |
| BD                 | 35.88          | 1  | 35.88       | 12.68   | 0.0035                    |
| CD                 | 59.14          | 1  | 59.14       | 20.90   | 0.0005                    |
| A <sup>2</sup>     | 0.51           | 1  | 0.51        | 0.18    | 0.6788                    |
| B <sup>2</sup>     | 393.51         | 1  | 393.51      | 139.09  | <0.0001                   |
| C <sup>2</sup>     | 843.03         | 1  | 843.03      | 297.97  | <0.0001                   |
| D <sup>2</sup>     | 77.90          | 1  | 77.90       | 27.53   | 0.0002                    |
| Residual           | 36.78          | 13 | 2.83        |         |                           |
| Lack of Fit        | 35.05          | 10 | 3.50        | 6.07    | 0.0823<br>not significant |
| Pure Error         | 1.73           | 3  | 0.58        |         |                           |
| Cor total          | 8706.28        | 29 |             |         |                           |

$R^2 = 0.996$ , adjusted  $R^2 = 0.991$ , predicted  $R^2 = 0.967$

Table S5. ANOVA for response surface quadratic model for RhB in single solution

| Source              | Sum of Squares | df | Mean Square | F-value | Prob > F                     |
|---------------------|----------------|----|-------------|---------|------------------------------|
| Block               | 118.43         | 2  | 59.21       |         |                              |
| Model               | 10188.41       | 14 | 727.74      | 107.90  | <0.0001                      |
| A-Time              | 233.38         | 1  | 233.38      | 34.60   | <0.0001                      |
| B-pH                | 2905.76        | 1  | 2905.76     | 430.83  | <0.0001                      |
| C-Dosage            | 1228.94        | 1  | 1228.94     | 182.21  | <0.0001                      |
| D-RhB concentration | 623.63         | 1  | 623.63      | 92.46   | <0.0001                      |
| AB                  | 10.56          | 1  | 10.56       | 1.57    | 0.2328                       |
| AC                  | 68.56          | 1  | 68.56       | 10.17   | 0.0071                       |
| AD                  | 30.31          | 1  | 30.31       | 4.49    | 0.0538                       |
| BC                  | 177.29         | 1  | 177.29      | 26.29   | 0.0002                       |
| BD                  | 2.86           | 1  | 2.86        | 0.42    | 0.5265                       |
| CD                  | 48.30          | 1  | 48.30       | 7.16    | 0.0190                       |
| A <sup>2</sup>      | 92.59          | 1  | 92.59       | 13.73   | 0.0026                       |
| B <sup>2</sup>      | 4774.48        | 1  | 4774.48     | 707.90  | <0.0001                      |
| C <sup>2</sup>      | 355.43         | 1  | 355.43      | 52.70   | <0.0001                      |
| D <sup>2</sup>      | 121.95         | 1  | 121.95      | 18.08   | 0.0009                       |
| Residual            | 87.86          | 13 | 6.74        |         |                              |
| Lack of Fit         | 80.72          | 10 | 8.07        | 3.48    | 0.1666<br>not<br>significant |
| Pure Error          | 6.69           | 3  | 2.32        |         |                              |
| Cor total           | 10394.51       | 29 |             |         |                              |

$R^2 = 0.992$ , adjusted  $R^2 = 0.982$ , predicted  $R^2 = 0.945$



Table S6. ANOVA for response surface quadratic model for MB in binary solution

| Source               | Sum of Squares | df | Mean Square | F-value | Prob > F                  |
|----------------------|----------------|----|-------------|---------|---------------------------|
| Model                | 8447.92        | 20 | 422.40      | 286.73  | <0.0001                   |
| A-Time               | 1.74           | 1  | 1.74        | 1.18    | 0.3003                    |
| B-pH                 | 1430.72        | 1  | 1430.72     | 971.19  | <0.0001                   |
| C-Dosage             | 4208.28        | 1  | 4208.28     | 2856.64 | <0.0001                   |
| D- MB concentration  | 1029.70        | 1  | 1029.70     | 698.97  | <0.0001                   |
| E- RhB concentration | 0.66           | 1  | 0.66        | 0.45    | 0.5174                    |
| AB                   | 6.69           | 1  | 6.69        | 4.54    | 0.0565                    |
| AC                   | 0.33           | 1  | 0.33        | 0.22    | 0.6454                    |
| AD                   | 23.42          | 1  | 23.45       | 15.90   | 0.0021                    |
| AE                   | 5.57           | 1  | 5.57        | 3.78    | 0.0779                    |
| BC                   | 314.38         | 1  | 314.38      | 213.41  | <0.0001                   |
| BD                   | 49.36          | 1  | 49.36       | 33.51   | 0.0001                    |
| BE                   | 12.78          | 1  | 12.78       | 8.67    | 0.0133                    |
| CD                   | 163.48         | 1  | 163.48      | 110.97  | <0.0001                   |
| CE                   | 0.93           | 1  | 0.93        | 0.63    | 0.4430                    |
| DE                   | 22.76          | 1  | 22.76       | 15.45   | 0.0023                    |
| A <sup>2</sup>       | 6.57           | 1  | 6.57        | 4.46    | 0.0583                    |
| B <sup>2</sup>       | 419.76         | 1  | 419.76      | 284.94  | <0.0001                   |
| C <sup>2</sup>       | 724.30         | 1  | 724.30      | 494.67  | <0.0001                   |
| D <sup>2</sup>       | 133.44         | 1  | 133.44      | 90.58   | <0.0001                   |
| E <sup>2</sup>       | 1.08           | 1  | 1.08        | 0.73    | 0.4107                    |
| Residual             | 16.20          | 11 | 1.47        |         |                           |
| Lack of Fit          | 12.54          | 6  | 2.09        | 2.85    | 0.1352<br>not significant |
| Pure Error           | 3.67           | 5  | 0.73        |         |                           |
| Cor total            | 8464.13        | 31 |             |         |                           |

$R^2 = 0.998$ , adjusted  $R^2 = 0.995$ , predicted  $R^2 = 0.959$

Table S7. ANOVA for response surface quadratic model for RhB in binary solution

| Source               | Sum of Squares | df | Mean Square | F-value | Prob > F        |
|----------------------|----------------|----|-------------|---------|-----------------|
| Model                | 8931.76        | 20 | 446.59      | 48.37   | <0.0001         |
| A-Time               | 0.97           | 1  | 0.97        | 0.11    | 0.7517          |
| B-pH                 | 2.35           | 1  | 2.35        | 0.25    | 0.6238          |
| C-Dosage             | 5008.66        | 1  | 5008.66     | 542.53  | <0.0001         |
| D- MB concentration  | 2374.67        | 1  | 2374.67     | 257.22  | <0.0001         |
| E- RhB concentration | 355.20         | 1  | 355.20      | 38.48   | <0.0001         |
| AB                   | 0.58           | 1  | 0.58        | 0.063   | 0.8065          |
| AC                   | 29.19          | 1  | 29.19       | 3.16    | 0.1030          |
| AD                   | 1.37           | 1  | 1.37        | 0.15    | 0.7069          |
| AE                   | 55.84          | 1  | 55.84       | 6.05    | 0.0317          |
| BC                   | 3.11           | 1  | 3.11        | 0.34    | 0.5736          |
| BD                   | 9.23           | 1  | 9.23        | 1.0     | 0.3389          |
| BE                   | 33.84          | 1  | 33.84       | 3.67    | 0.0819          |
| CD                   | 47.58          | 1  | 47.58       | 5.15    | 0.0443          |
| CE                   | 17.00          | 1  | 17.00       | 1.84    | 0.2020          |
| DE                   | 36.27          | 1  | 36.27       | 3.93    | 0.0730          |
| A <sup>2</sup>       | 9.17           | 1  | 9.17        | 0.99    | 0.3403          |
| B <sup>2</sup>       | 313.03         | 1  | 313.03      | 33.91   | 0.0001          |
| C <sup>2</sup>       | 550.49         | 1  | 550.49      | 59.63   | <0.0001         |
| D <sup>2</sup>       | 3.61           | 1  | 3.61        | 0.39    | 0.5445          |
| E <sup>2</sup>       | 0.83           | 1  | 0.83        | 0.090   | 0.7702          |
| Residual             | 101.55         | 11 | 9.23        |         | 0.1235          |
| Lack of Fit          | 79.53          | 6  | 13.26       | 3.01    | not significant |
| Pure Error           | 22.02          | 5  | 4.40        |         |                 |
| Cor total            | 9033.31        | 31 |             |         |                 |

$R^2 = 0.989$ , adjusted  $R^2 = 0.968$ , predicted  $R^2 = 0.762$

## Equations S1-4

$$R1 = +94.01 + 0.88A + 8.59B + 13.34C - 5.5D + 0.22AB - 0.22AC + 0.37AD - 6.14BC + 1.50BD + 1.92CD + 0.14A^2 - 3.79B^2 - 5.54C^2 - 1.69D^2 \quad (1)$$

$$R2 = +89.26 + 3.12A - 11.00B + 7.16C - 5.10D - 3.33AB + 0.81AC - 0.42AD - 2.07BC - 1.74BD - 1.38CD - 13.19A^2 - 3.60B^2 - 1.84C^2 - 2.11D^2 \quad (2)$$

$$R3 = +92.30 + 0.27A + 7.72B + 13.24C - 6.55D - 0.17E - 0.65AB + 0.14AC - 1.21AD + 0.59AE + 4.43BC + 1.76BD + 0.89BE + 3.20CD - 0.24CE + 1.19DE + 0.47A^2 - 3.78B^2 - 4.97C^2 - 2.13D^2 - 0.19E^2 \quad (3)$$

$$R4 = +34.08 + 0.20A + 0.31B + 14.45C - 9.95D - 3.85E - 0.19AB + 1.35AC - 0.29AD + 1.87AE + 0.44BC + 0.76BD - 1.45BE - 1.72CD - 1.03CE + 1.5DE - 0.56A^2 - 3.27B^2 + 4.33C^2 + 0.35D^2 - 0.17E^2 \quad (4)$$
